# Supplementary material for: Influence of alectinib and crizotinib on ionizing radiation - in vitro analysis of ALK/ROS1-wildtype lung tissue cells
Source: PubMed Central journal article supplement — Neoplasia. 2022 Mar 9;27:100780. doi: 10.1016/j.neo.2022.100780 (PMC8914391; doi:10.1016/j.neo.2022.100780), 2022-03-09
Supplement: mmc1.pdf [file mmc1.pdf]

Supplementary Material

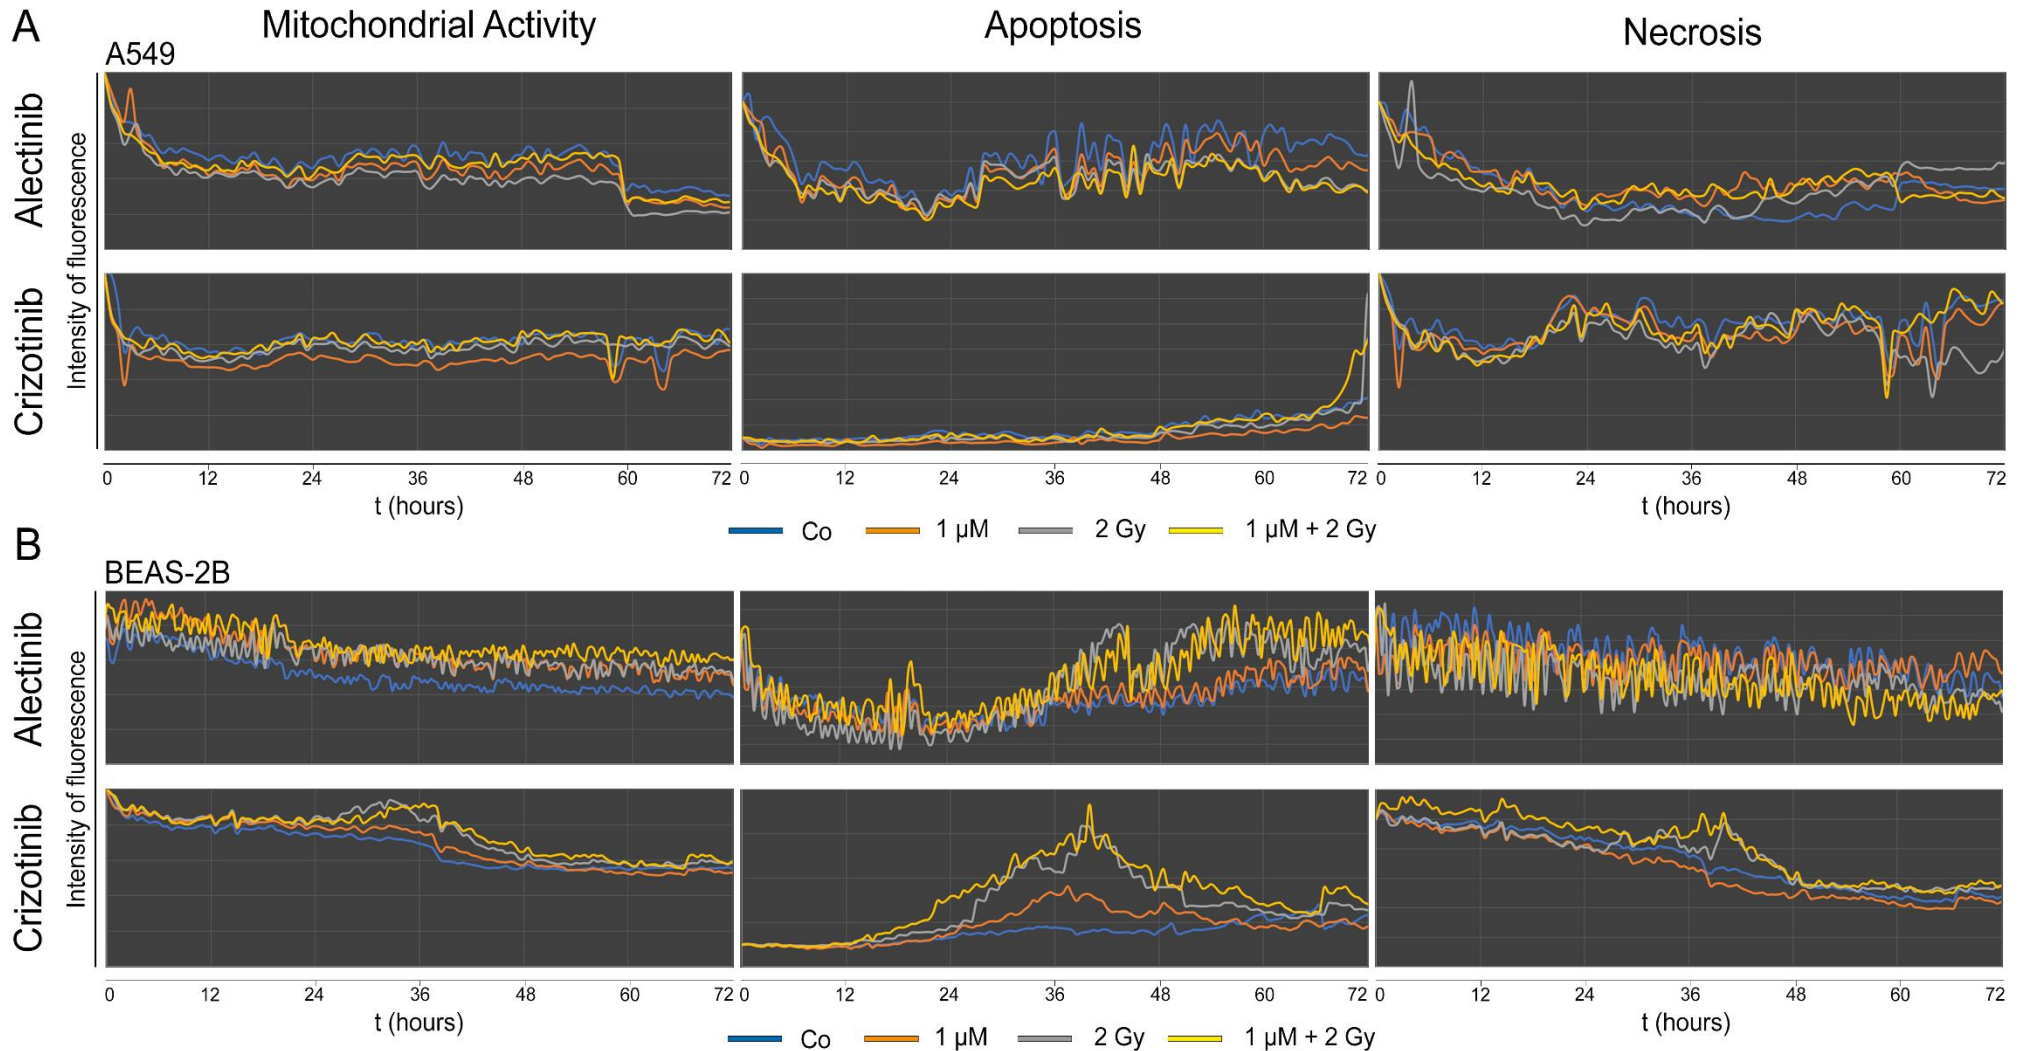

**Figure S1:** Live cell imaging of cell line A549 (a) and BEAS-2B (b) under treatment (Co, 1  $\mu$ M KI, 2 Gy IR, combination KI + IR) from timepoint  $t = 0$  h up to  $t = 48$  h. Cells were grown and either treated with 1  $\mu$ M kinase (orange line) inhibitor (alectinib or crizotinib), 2 Gy (grey line) or a combination of both (yellow line) in cell culture chips of ibidi (Gräfelfing, Germany), additionally to a untreated control (blue line). Tetramethylrhodamine (TMRM, Invitrogen, Carlsbad, CA, USA) was used to measure mitochondrial activity based on mitochondrial membrane potential, CellEvent Caspase 3/7 (Invitrogen, Carlsbad, CA, USA) for staining of apoptosis and DRAQ7 (Abcam, Cambridge, UK) for necrosis. Curves of intensity of fluorescence are plotted over time.

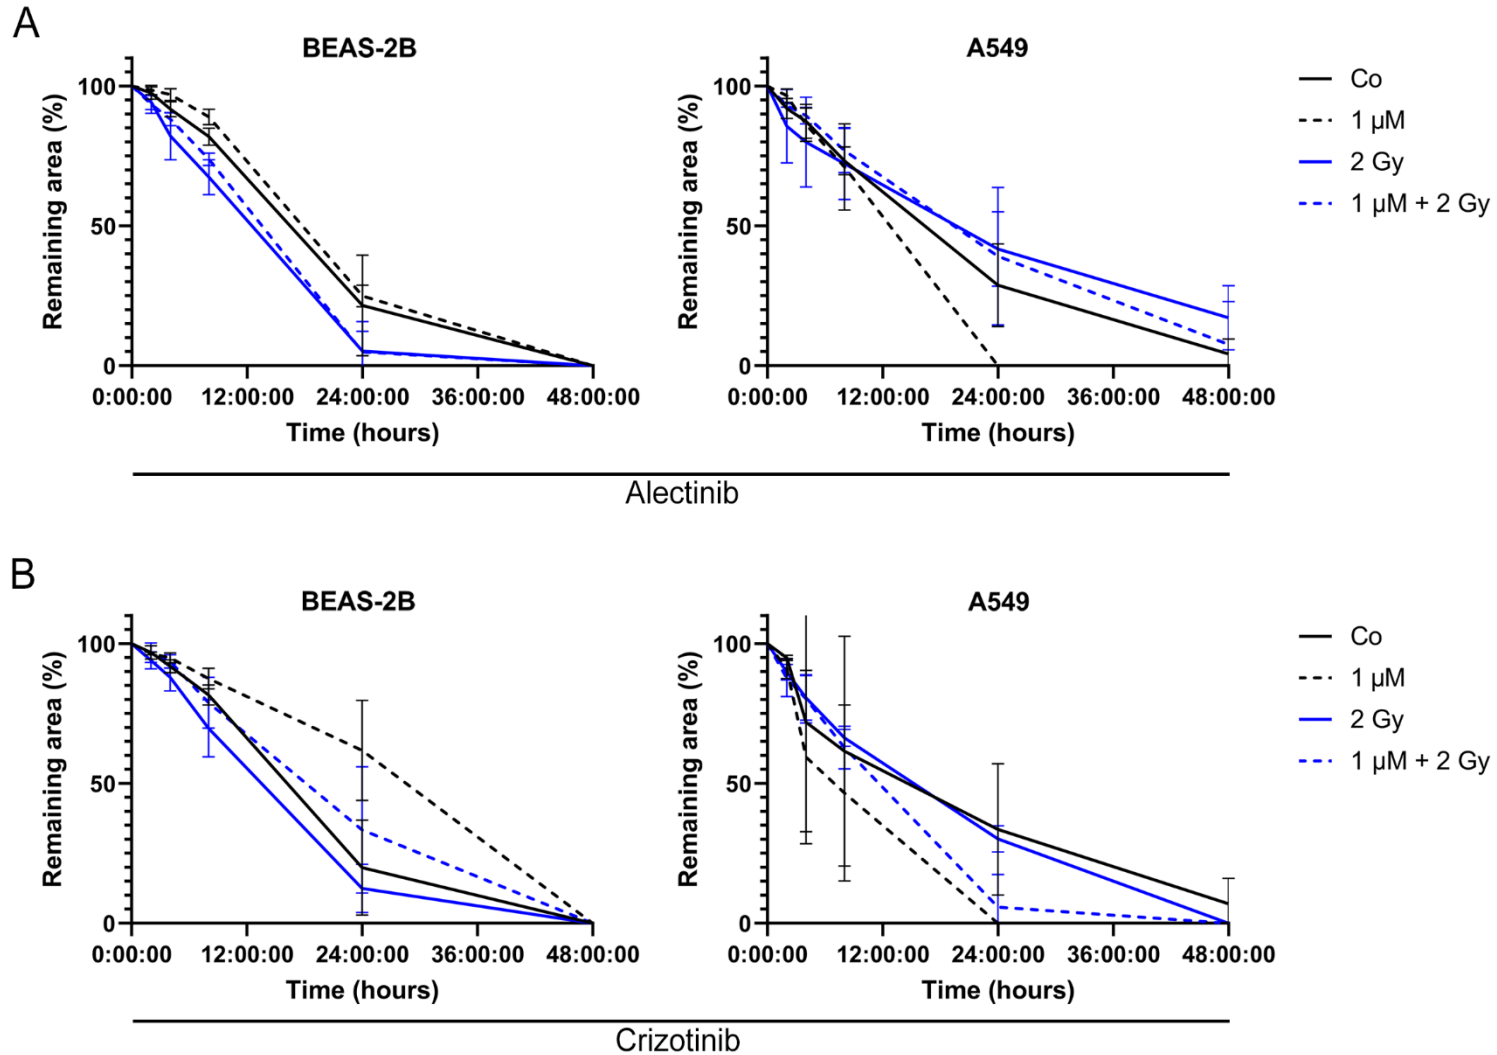

**Figure S2:** Influence of ALK/ROS1 inhibitors alectinib and crizotinib on migration behavior of lung cell lines BEAS-2B and A549. Both ALK/ROS1 wildtype lung cells were treated with 1  $\mu$ M alectinib or (a) crizotinib (b) w/o 2 Gy IR for 48 h and decrease of scratch area was measured over time. Each value represents mean  $\pm$  SD (n = 4).

A

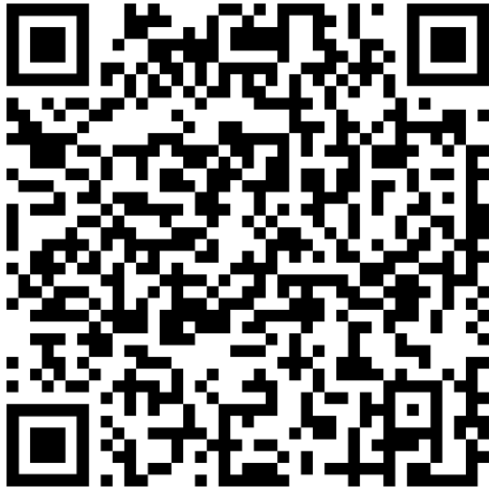

*A549 under treatment of alectinib*

B

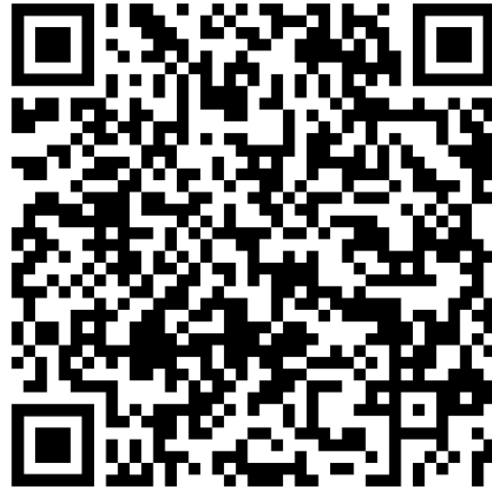

*BEAS-2B under treatment of alectinib*

**Figure S3:** Representative example of live cell imaging of cell line A549 (a) and BEAS-2B (b) under treatment over a time-period of 72 h. Cells were grown and treated with 1  $\mu$ M alectinib in cell culture chips of ibidi (Gräfelfing, Germany). Tetramethylrhodamine (TMRM, Invitrogen, Carlsbad, CA, USA) was used to measure mitochondrial activity based on mitochondrial membrane potential (green), CellEvent Caspase 3/7 (Invitrogen, Carlsbad, CA, USA) for staining of apoptosis (blue) and DRAQ7 (Abcam, Cambridge, UK) for necrosis (red).
